# Supplementary material for: The Microbial Community Structure in the Rhizosphere of Theobroma cacao L. and Euterpe oleracea Mart. Is Influenced by Agriculture System in the Brazilian Amazon
Source: MDPI journal article supplement (doi:10.3390/microorganisms12020398), 2024-02-17
Supplement: s1 [file s1]

## Supplementary Materials

**Table S1.** Quantitative test of antimicrobial substance (AMS) production by strain affiliated with the genus *Bacillus* sp.

| Bacterial strains | Inhibition (%)        |                   |                 |                       |                |                    |
|-------------------|-----------------------|-------------------|-----------------|-----------------------|----------------|--------------------|
|                   | <i>Colletotrichum</i> | <i>Curvularia</i> | <i>Fusarium</i> | <i>Pestalotiopsis</i> | <i>Pythium</i> | <i>Rhizoctonia</i> |
| CP1-28            | 59,15±3,00a           | 71,76±2,52a       | 75,71±2,00ab    | 47,15±1,15a           | 62,50±1,00ab   | 68,66±1,73ab       |
| CP1-30            | 59,62±1,52a           | 76,85±1,15ab      | 84,29±9,54ab    | 56,91±1,15a           | 50,00±7,55a    | 65,17±1,15a        |
| CP2-47            | 63,38±1,00a           | 77,78±2,65ab      | 85,24±9,07ab    | 58,54±1,00a           | 55,09±2,31ab   | 68,66±1,00ab       |
| CP2-38            | 60,56±0,00a           | 75,00±4,36ab      | 66,19±3,06a     | 64,23±6,81a           | 60,65±2,31ab   | 72,14±2,52ab       |
| CP2-13            | 62,91±1,52a           | 75,93±0,58ab      | 73,81±1,15ab    | 63,41±3,61a           | 61,57±7,23ab   | 69,65±3,79ab       |
| CP3-40            | 100,00±0,00c          | 100,00±0,00c      | 100,00±0,00b    | 100,00±0,00b          | 69,44±0,00b    | 100,00±0,00c       |

Means ± SD with common letters in the same column do not show significant differences ( $p < 0,05$ ) by Tukey's test.

A

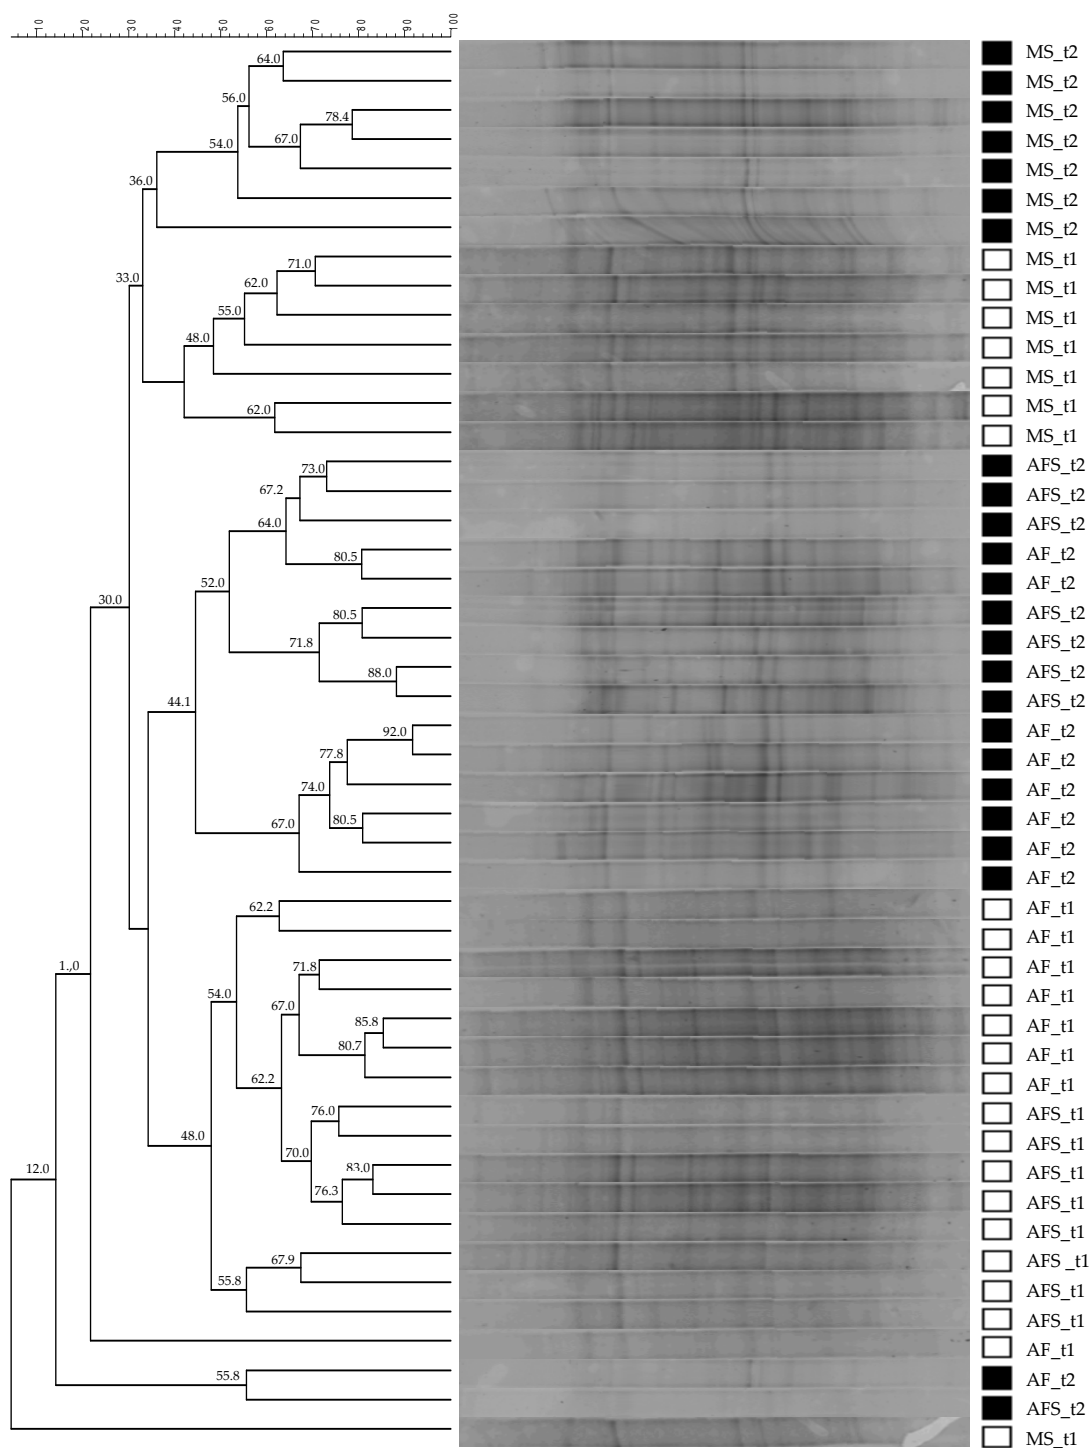

**B**

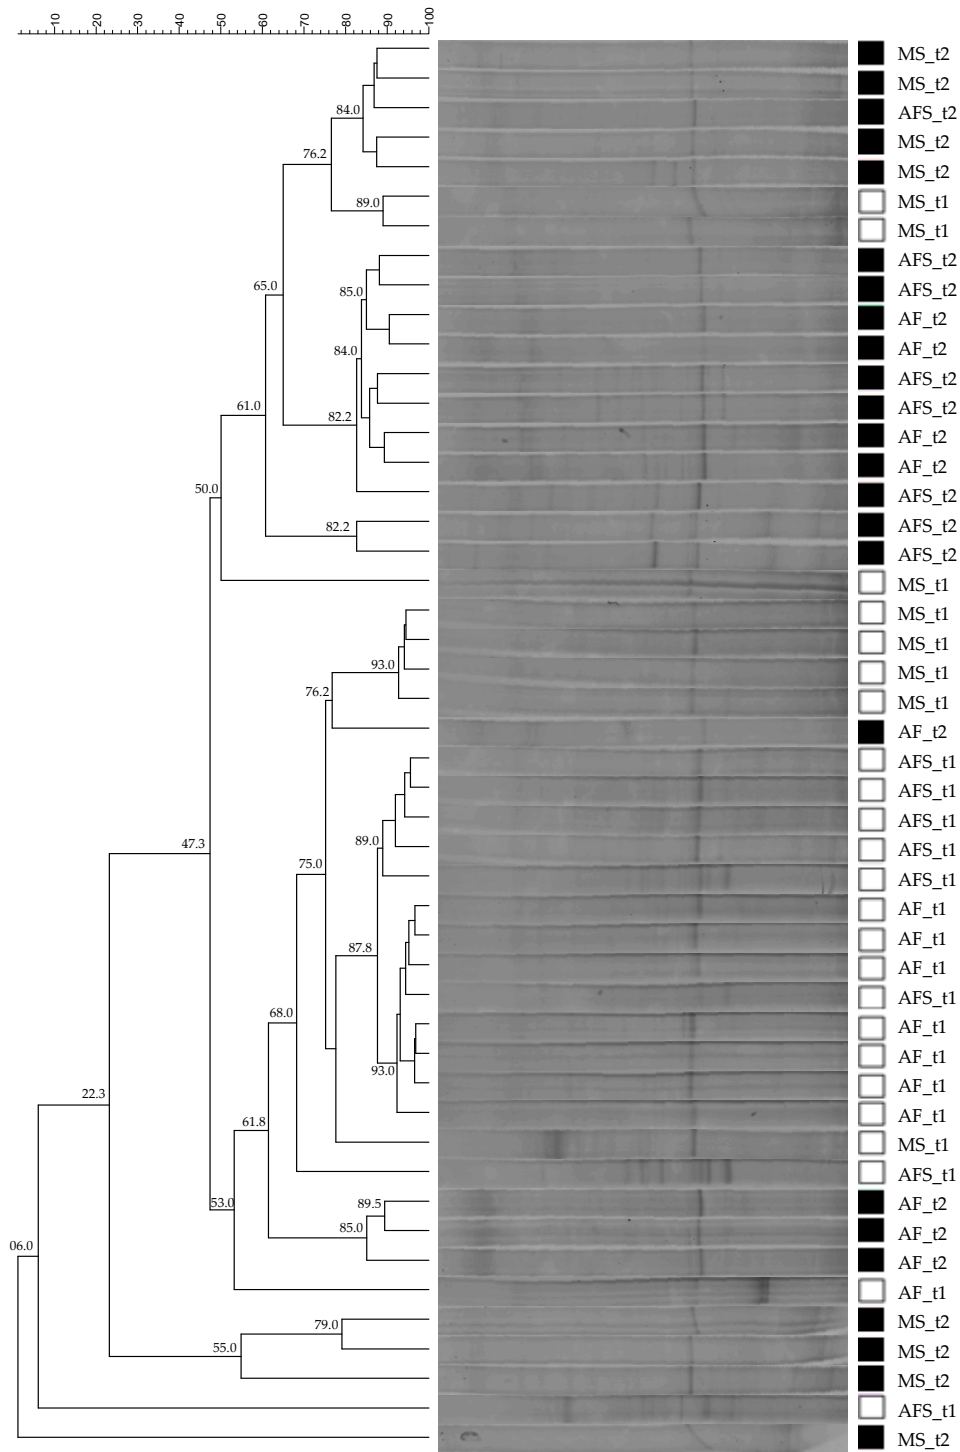

C

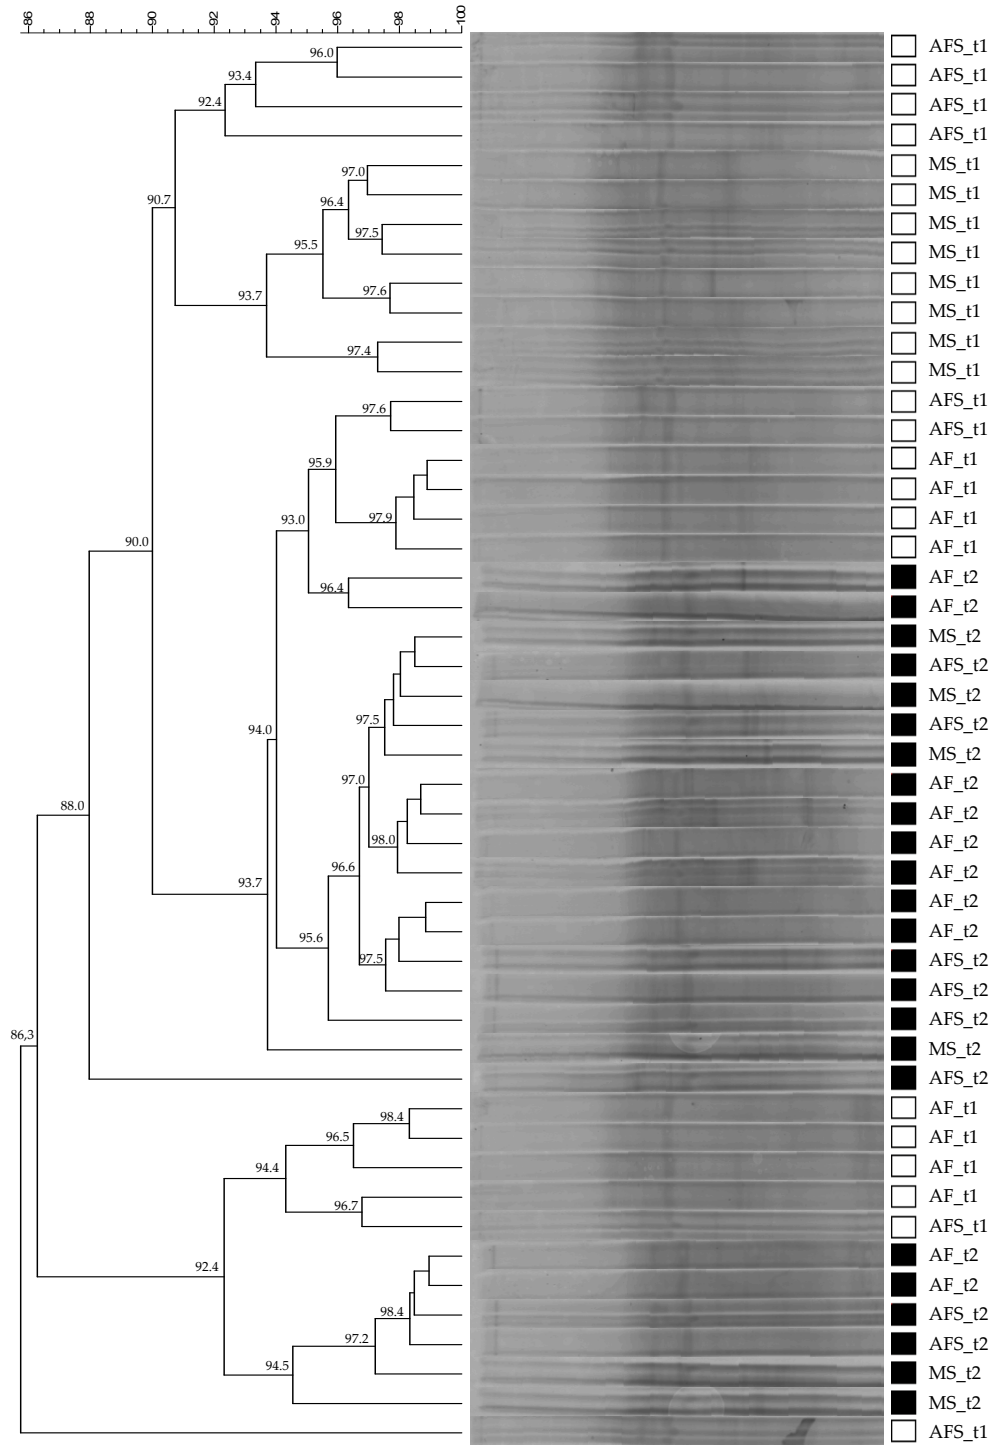

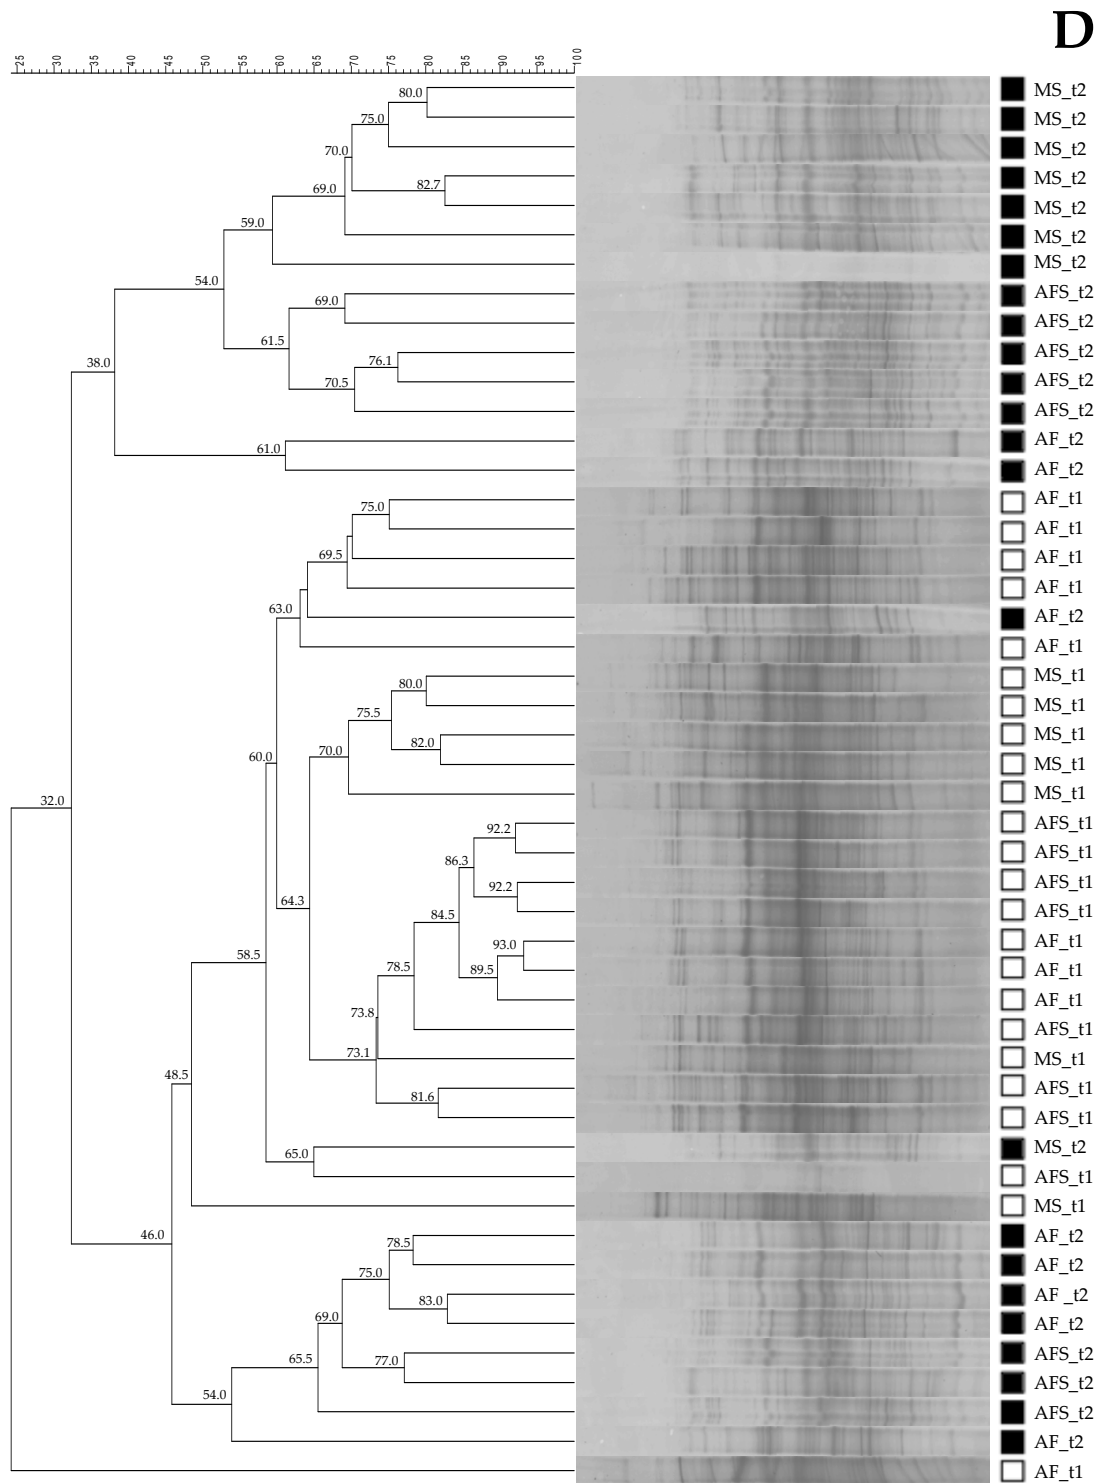

**Figure S1.** UPGMA cluster analysis of the DGGE fingerprint of bacterial communities (A), phosphate-solubilizing bacteria (B), diazotrophic (C), and fungi (D) in AFS, MS e AF systems during dry (t1) and rainy (t2) seasons.
